# Supplementary material
Source: HighWire-hosted journal article supplement (http://www.qdcxjkg.com/highwire/filestream/113389/field_highwire_adjunct_files/0/ERJ-01735-2012_Disclosures.pdf)
Supplement: ERJ-01735-2012_Disclosures.pdf [file ERJ-01735-2012_Disclosures.pdf]

R. Naeije has received reimbursements of travel expenses to congresses and speakers' fees from Actelion, Pfizer, Glaxo, Bayer, Lilly, LungRX and United Therapeutics.
